# Supplementary material for: Aesthetically improved and efficient tannin–metal chelates for the treatment of dentinal hypersensitivity
Source: Royal Society of Chemistry journal article supplement (doi:10.1039/c6ra24745h), 2016-12-22
Supplement: c6ra24745h1.pdf [file c6ra24745h1.pdf]

**Supplementary information**

**Aesthetically improved and efficient tannin-metal chelates for the treatment of dentinal hypersensitivity**

Sung-Won Ju<sup>a†</sup>, Ekavianty Prajatelista<sup>b †</sup>, Sang Ho Jun<sup>c</sup>, and Dong Soo Hwang<sup>b,d,e</sup> Jin-Soo Ahn<sup>a\*</sup>, Naresh D. Sanandiya<sup>d\*</sup>

*<sup>a</sup>Dental Research Institute and Department of Biomaterials Science, School of Dentistry Seoul National University, Seoul 110-749, South Korea*

*<sup>b</sup>School of Interdisciplinary Bioscience and Bioengineering, Pohang University of Science and Technology, Pohang 790-784, South Korea,*

*<sup>c</sup>Division of Oral and Maxillofacial Surgery, Department of Dentistry, Korea University Anam Hospital, Seoul 136-705, South Korea*

*<sup>d</sup>Division of Integrative Bioscience and Biotechnology, Pohang University of Science and Technology (POSTECH), Pohang 790-784, South Korea*

*<sup>e</sup>School of Environmental Science and Engineering, Pohang University of Science and Technology (POSTECH), Pohang 790-784, South Korea*

\*Corresponding authors E-mail: ahnjin@snu.ac.kr (J.S.A); nareshsanandiya@gmail.com (N.D.S)

† S.W. Ju and E. Prajatelista contributed equally to this work

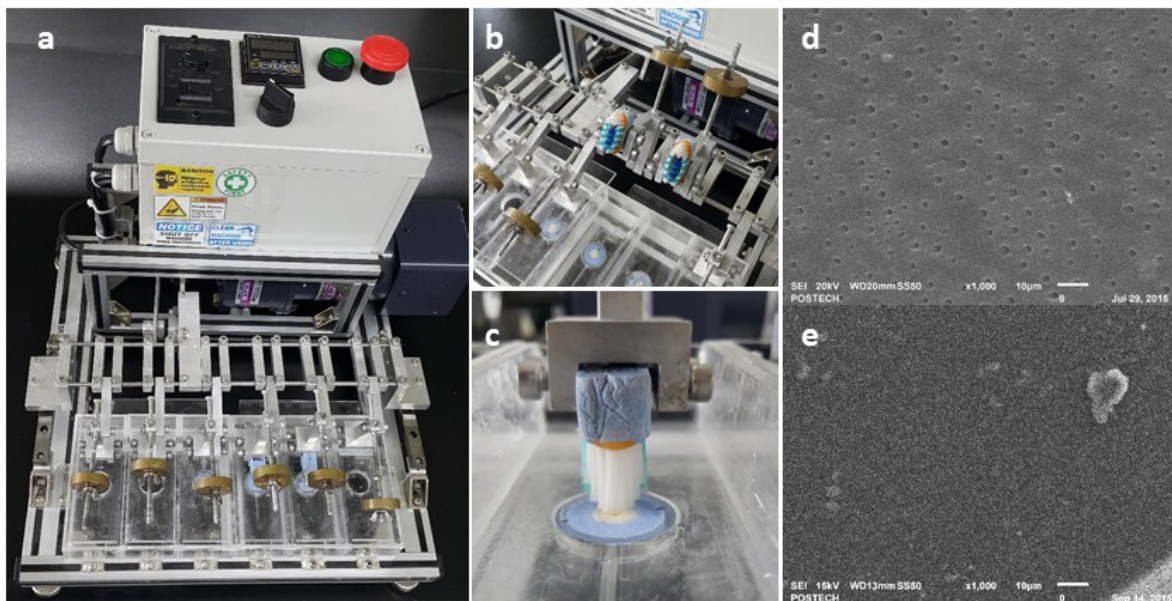

Fig. S1. (a,b,c) Custom built tooth brushing machine, (d) SEM images of untreated sample (control) and (e) brushed treated sample.
